# Supplementary material for: Cell Type-Specific TGF-β Mediated EMT in 3D and 2D Models and Its Reversal by TGF-β Receptor Kinase Inhibitor in Ovarian Cancer Cell Lines
Source: MDPI journal article supplement (doi:10.3390/ijms20143568), 2019-07-22
Supplement: s1 [file s1]

| GENE NAME     | PRIMER NAME             |
|---------------|-------------------------|
| N-cadherin F  | AGCCAACCTTAACTGAGGAGT   |
| N-cadherin R  | GGCAAGTTGATTGGAGGGATG   |
| COL1A2F       | GGCCCTCAAGGTTTCCAAGG    |
| COL1A2R       | CACCCTGTGGTCCAACAACCTC  |
| COL3A1F       | GCCAAATATGTGTCTGTGACTCA |
| COL3A1R       | GGGCGAGTAGGAGCAGTTG     |
| COL5A2F       | GACTGTGCCGACCCTGTAAC    |
| COL5A2R       | CCTGGACGACCACGTATGC     |
| FN1F          | CGGTGGCTGTCAGTCAAAG     |
| FN1R          | AAACCTCGGCTTCCTCCATAA   |
| MMP2F         | TACAGGATCATTGGCTACACACC |
| MMP2R         | GGTCACATCGCTCCAGACT     |
| VIMF          | GACGCCATCAACACCGAGTT    |
| VIMR          | CTTTGTCTGTTGGTTAGCTGGT  |
| CDH1F         | CGAGAGCTACACGTTACGG     |
| CDH1R         | GGGTGTGAGGGAAAAATAGG    |
| desmoplakinF  | GAAGTTTTCGACACCTGACAT   |
| desmoplakinR  | GTATGCACCATTCAACTCCTCG  |
| FOXC2F        | CCTCCTGGTATCTCAACCACA   |
| FOXC2R        | GAGGGTCGAGTTCTCAATCCC   |
| TGFB2F        | CAGCACACTCGATATGGACCA   |
| TGFB2R        | CCTCGGGCTCAGGATAGTCT    |
| tgfb1F        | GGCCAGATCCTGTCCAAGC     |
| tgfb1R        | GTGGGTTTCCACCATTAGCAC   |
| cd44F         | CTGCCGCTTTGCAGGTGTA     |
| cd44R         | CATTGTGGGCAAGGTGCTATT   |
| itga1F        | GTGCTTATTGGTTCTCCGTTAGT |
| itga1R        | CACAAGCCAGAAATCCTCCAT   |
| COL6A2F       | TACGGAGAGTGCTACAAGGTG   |
| COL6A2R       | GGTCCTGGGAATCCAATGGG    |
| LAMB1F        | CACAAGCCCGAACCCTACTG    |
| LAMB1R        | GACCACATTTTCAATGAGATGGC |
| col4a1F       | GGACTACCTGGAACAAAAGGG   |
| col4a1R       | GCCAAGTATCTCACCTGGATCA  |
| vitronectin 1 | GCCTTCACCGACCTCAAGAAC   |
| vitronectin 2 | CCCCTGACAGTTGATGCGG     |
| EPCAM1        | AATCGTCAATGCCAGTGTACTT  |
| EPCAM2        | TCTCATCGCAGTCAGGATCATAA |
| oct4F         | CTTGAATCCCGAATGGAAAGGG  |

|             |                         |
|-------------|-------------------------|
| octR        | CCTTCCCAAATAGAACCCCCA   |
| beta actinF | CATGTACGTTGCTATCCAGGC   |
| beta actinR | CTCCTTAATGTCACGCACGAT   |
| 18SF        | GTAACCCGTTGAACCCCAT     |
| 18S R.      | CCATCCAATCGGTAGTAGCG    |
| HIF1A F     | CACCACAGGACAGTACAGGAT   |
| HIF1A R     | CGTGCTGAATAATACCACTCACA |
| MYC F       | GTCAAGAGGCGAACACACAAC   |
| MYC R       | TTGGACGGACAGGATGTATGC   |
| CAV1F       | CATCCCGATGGCACTCATCTG   |
| CAV1 R      | TGCACTGAATCTCAATCAGGAAG |
| snail 1f    | ACTGCAACAAGGAATACCTCAG  |
| snail 1 r   | GCACTGGTACTTCTTGACATCTG |
| twist1f     | GTCCGCAGTCTTACGAGGAG    |
| twist1 r    | GCTTGAGGGTCTGAATCTTGCT  |
| muc16f      | CCAGTCCTACATCTTCGGTTGT  |
| muc16r      | AGGGTAGTTCCTAGAGGGAGTT  |
| cd24f       | CTCCTACCCACGCAGATTTATTC |
| cd24r       | AGAGTGAGACCACGAAGAGAC   |
| gapdh F     | GGAGCGAGATCCCTCCAAAAT   |
| gapdh R     | GGCTGTTGTCATACTTCTCATGG |
