# Supplementary material for: Cell Type-Specific TGF-β Mediated EMT in 3D and 2D Models and Its Reversal by TGF-β Receptor Kinase Inhibitor in Ovarian Cancer Cell Lines
Source: MDPI journal article supplement (doi:10.3390/ijms20143568), 2019-07-22
Supplement: s1 [file s1]

## KEGG Pathways for upregulated genes 3D vs. 2D

| Sublist                  | Category     | Term                                                                     | RT                 | Genes                                                                                 | Count | %   | P-Value | Benjamini |
|--------------------------|--------------|--------------------------------------------------------------------------|--------------------|---------------------------------------------------------------------------------------|-------|-----|---------|-----------|
| <input type="checkbox"/> | KEGG_PATHWAY | <a href="#">Basal cell carcinoma</a>                                     | <a href="#">RT</a> |    | 7     | 1.9 | 3.1E-4  | 5.8E-2    |
| <input type="checkbox"/> | KEGG_PATHWAY | <a href="#">PI3K-Akt signaling pathway</a>                               | <a href="#">RT</a> |    | 16    | 4.3 | 6.6E-4  | 6.3E-2    |
| <input type="checkbox"/> | KEGG_PATHWAY | <a href="#">Pathways in cancer</a>                                       | <a href="#">RT</a> |    | 17    | 4.6 | 8.9E-4  | 5.6E-2    |
| <input type="checkbox"/> | KEGG_PATHWAY | <a href="#">TGF-beta signaling pathway</a>                               | <a href="#">RT</a> |    | 7     | 1.9 | 2.9E-3  | 1.3E-1    |
| <input type="checkbox"/> | KEGG_PATHWAY | <a href="#">Central carbon metabolism in cancer</a>                      | <a href="#">RT</a> |    | 6     | 1.6 | 4.4E-3  | 1.6E-1    |
| <input type="checkbox"/> | KEGG_PATHWAY | <a href="#">Hippo signaling pathway</a>                                  | <a href="#">RT</a> |    | 8     | 2.2 | 1.4E-2  | 3.6E-1    |
| <input type="checkbox"/> | KEGG_PATHWAY | <a href="#">Focal adhesion</a>                                           | <a href="#">RT</a> |    | 9     | 2.4 | 2.3E-2  | 4.8E-1    |
| <input type="checkbox"/> | KEGG_PATHWAY | <a href="#">HIF-1 signaling pathway</a>                                  | <a href="#">RT</a> |    | 6     | 1.6 | 2.5E-2  | 4.6E-1    |
| <input type="checkbox"/> | KEGG_PATHWAY | <a href="#">Rap1 signaling pathway</a>                                   | <a href="#">RT</a> |    | 9     | 2.4 | 2.6E-2  | 4.3E-1    |
| <input type="checkbox"/> | KEGG_PATHWAY | <a href="#">Adipocytokine signaling pathway</a>                          | <a href="#">RT</a> |    | 5     | 1.3 | 3.0E-2  | 4.5E-1    |
| <input type="checkbox"/> | KEGG_PATHWAY | <a href="#">Signaling pathways regulating pluripotency of stem cells</a> | <a href="#">RT</a> |    | 7     | 1.9 | 3.1E-2  | 4.3E-1    |
| <input type="checkbox"/> | KEGG_PATHWAY | <a href="#">Melanoma</a>                                                 | <a href="#">RT</a> |    | 5     | 1.3 | 3.2E-2  | 4.1E-1    |
| <input type="checkbox"/> | KEGG_PATHWAY | <a href="#">Arginine biosynthesis</a>                                    | <a href="#">RT</a> |    | 3     | 0.8 | 4.4E-2  | 4.9E-1    |
| <input type="checkbox"/> | KEGG_PATHWAY | <a href="#">Proteoglycans in cancer</a>                                  | <a href="#">RT</a> |    | 8     | 2.2 | 5.3E-2  | 5.3E-1    |
| <input type="checkbox"/> | KEGG_PATHWAY | <a href="#">ECM-receptor interaction</a>                                 | <a href="#">RT</a> |    | 5     | 1.3 | 6.0E-2  | 5.5E-1    |
| <input type="checkbox"/> | KEGG_PATHWAY | <a href="#">Prostate cancer</a>                                          | <a href="#">RT</a> |   | 5     | 1.3 | 6.2E-2  | 5.4E-1    |
| <input type="checkbox"/> | KEGG_PATHWAY | <a href="#">HTLV-I infection</a>                                         | <a href="#">RT</a> |  | 9     | 2.4 | 6.8E-2  | 5.5E-1    |
| <input type="checkbox"/> | KEGG_PATHWAY | <a href="#">Cytokine-cytokine receptor interaction</a>                   | <a href="#">RT</a> |  | 8     | 2.2 | 9.5E-2  | 6.6E-1    |
| <input type="checkbox"/> | KEGG_PATHWAY | <a href="#">Mucin type O-Glycan biosynthesis</a>                         | <a href="#">RT</a> |  | 3     | 0.8 | 9.6E-2  | 6.5E-1    |
| <input type="checkbox"/> | KEGG_PATHWAY | <a href="#">Pancreatic cancer</a>                                        | <a href="#">RT</a> |  | 4     | 1.1 | 9.7E-2  | 6.3E-1    |
