# Supplementary material for: Cell Type-Specific TGF-β Mediated EMT in 3D and 2D Models and Its Reversal by TGF-β Receptor Kinase Inhibitor in Ovarian Cancer Cell Lines
Source: MDPI journal article supplement (doi:10.3390/ijms20143568), 2019-07-22
Supplement: s1 [file s1]

# Supplementary figure 1

control

TGFb

Ly364947

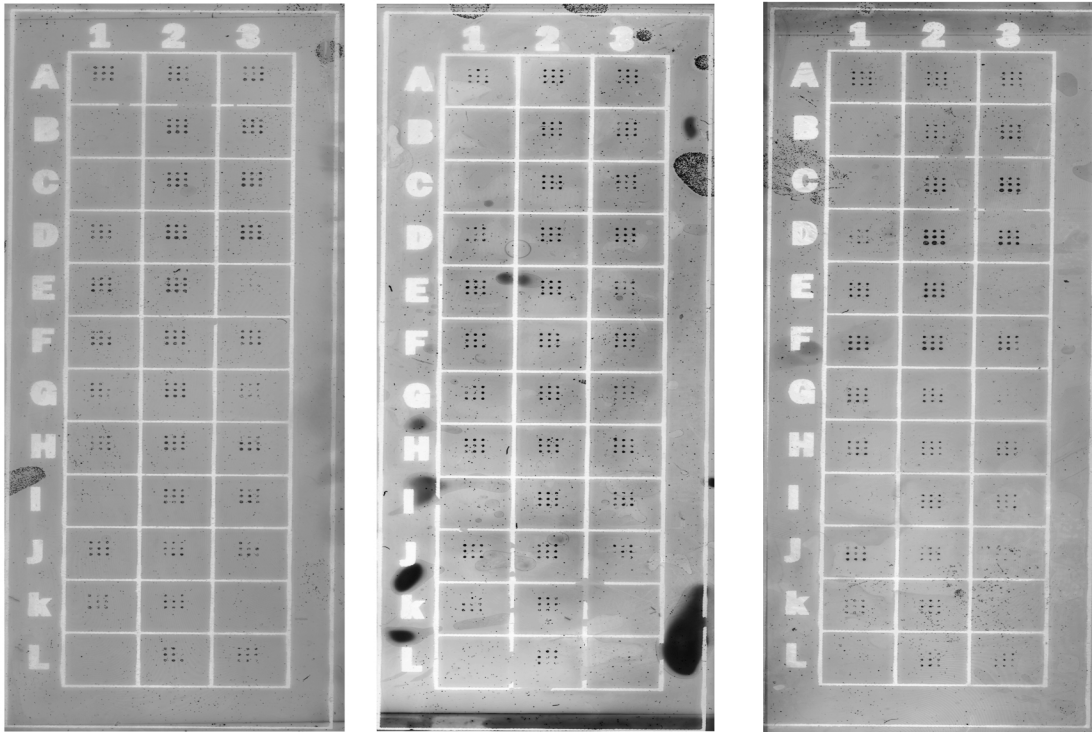

## Array Layout

|   | 1                                                | 2                                                                                                   | 3                                                |
|---|--------------------------------------------------|-----------------------------------------------------------------------------------------------------|--------------------------------------------------|
| A | Collagen I (250µg/ml)                            | Collagen I (125µg/ml)<br>Collagen III (125µg/ml)                                                    | Fibronectin (125µg/ml)<br>Collagen IV (125µg/ml) |
| B | Collagen III (250µg/ml)                          | Collagen I (125µg/ml)<br>Collagen IV (125µg/ml)                                                     | Fibronectin (125µg/ml)<br>Collagen VI (125µg/ml) |
| C | Collagen IV (250µg/ml)                           | Collagen I (125µg/ml)<br>Collagen V (125µg/ml)                                                      | Fibronectin (125µg/ml)<br>Laminin (125µg/ml)     |
| D | Collagen V (250µg/ml)                            | Collagen I (125µg/ml)<br>Collagen VI (125µg/ml)                                                     | Fibronectin (125µg/ml)<br>Vitronectin(125µg/ml)  |
| E | Collagen VI (250µg/ml)                           | Collagen I (125µg/ml)<br>Fibronectin (125µg/ml)                                                     | Laminin (125µg/ml)<br>Collagen IV (125µg/ml)     |
| F | Fibronectin (250µg/ml)                           | Collagen I (125µg/ml)<br>Laminin (125µg/ml)                                                         | Laminin (125µg/ml)<br>Collagen VI (125µg/ml)     |
| G | Laminin (250µg/ml)                               | Collagen I (125µg/ml)<br>Vitronectin (125µg/ml)                                                     | Vitronectin (125µg/ml)<br>Collagen IV (125µg/ml) |
| H | Vitronectin (250µg/ml)                           | Collagen I (125µg/ml)<br>Topoelastin (125µg/ml)                                                     | Vitronectin (125µg/ml)<br>Collagen VI (125µg/ml) |
| I | Topoelastin (250µg/ml)                           | Fibronectin (83.3µg/ml)<br>Laminin (83.3µg/ml)<br>Collagen I (83.3µg/ml)                            | Vitronectin (125µg/ml)<br>Laminin (125µg/ml)     |
| J | Collagen IV (125µg/ml)<br>Collagen VI (125µg/ml) | Fibronectin (83.3µg/ml)<br>Laminin (83.3µg/ml)<br>Collagen IV (83.3µg/ml)                           | Vitronectin (125µg/ml)<br>Topoelastin (125µg/ml) |
| K | Collagen III (125µg/ml)<br>Collagen V (125µg/ml) | Vitronectin (62.5µg/ml)<br>Laminin (62.5µg/ml)<br>Collagen I (62.5µg/ml)<br>Collagen IV (62.5µg/ml) | Topoelastin (125µg/ml)<br>Collagen IV (125µg/ml) |
| L | Negative Control<br>BSA (250µg/ml)               | Fibronectin (62.5µg/ml)<br>Laminin (62.5µg/ml)<br>Collagen I (62.5µg/ml)<br>Collagen IV (62.5µg/ml) | Topoelastin (125µg/ml)<br>Collagen VI (125µg/ml) |
