# Supplementary material for: Cell Type-Specific TGF-β Mediated EMT in 3D and 2D Models and Its Reversal by TGF-β Receptor Kinase Inhibitor in Ovarian Cancer Cell Lines
Source: Int J Mol Sci. 2019 Jul 22;20(14):3568. doi: 10.3390/ijms20143568 (PMC6678358; doi:10.3390/ijms20143568)
Supplement: Supplementary file 1 [file ijms-20-03568-s001.zip]

Archive with 7 entries (7 files):
- supplimetary figure 1.pdf
- suppli_table 1.docx
- PRIMER LIST 1-suppli file 1.pdf
- Supplimentary figure 2.pdf
- supplimentary file 2.pdf
- __MACOSX/._supplimetary figure 1.pdf
- __MACOSX/._suppli_table 1.docx
